# Supplementary material for: Photoswitchable alkoxy-bridged binuclear rhenium(i) complexes – a potential probe for biomolecules and optical cell imaging
Source: Royal Society of Chemistry journal article supplement (doi:10.1039/c3ra42627k), 2013-01-01
Supplement: c3ra42627k.pdf [file c3ra42627k.pdf]

Electronic Supplementary Information (ESI) for

**Photoswitchable Alkoxy-Bridged Binuclear Rhenium(I) Complexes – A  
Potential Probe for Biomolecules and Optical Cell Imaging**

Veerasamy Sathish,<sup>a</sup> Eththilu Babu,<sup>a</sup> Arumugam Ramdass,<sup>a</sup> Zong-Zhan Lu,<sup>b</sup> Tzu-Ting Chang,<sup>b</sup>  
Murugesan Velayudham,<sup>b</sup> Pounraj Thanasekaran,<sup>b</sup> Kuang-Lieh Lu,<sup>\*b</sup> Wen-Shan Li,<sup>\*b</sup> and  
Seenivasan Rajagopal<sup>\*a</sup>

<sup>a</sup>*Department of Physical Chemistry, School of Chemistry, Madurai Kamaraj University,  
Madurai, Tamilnadu, India*

<sup>b</sup>*Institute of Chemistry, Academia Sinica, Taipei 115, Taiwan*

**Table S1.** Crystallographic data of **1**.

| <b>1</b>                                                                |                                                                               |
|-------------------------------------------------------------------------|-------------------------------------------------------------------------------|
| empirical formula                                                       | C <sub>48</sub> H <sub>44</sub> N <sub>2</sub> O <sub>8</sub> Re <sub>2</sub> |
| <i>M<sub>w</sub></i>                                                    | 1149.27                                                                       |
| crystal system                                                          | orthorhombic                                                                  |
| space group                                                             | <i>P</i> 2 <sub>1</sub> 2 <sub>1</sub> 2 <sub>1</sub>                         |
| <i>a</i> (Å)                                                            | 14.0169(3)                                                                    |
| <i>b</i> (Å)                                                            | 16.7072(3)                                                                    |
| <i>c</i> (Å)                                                            | 19.0984(4)                                                                    |
| <i>V</i> (Å <sup>3</sup> )                                              | 4472.52(16)                                                                   |
| <i>Z</i>                                                                | 4                                                                             |
| <i>T</i> (K)                                                            | 296                                                                           |
| $\lambda$ (Å)                                                           | 0.71073                                                                       |
| <i>D<sub>calc</sub></i> (g cm <sup>-3</sup> )                           | 1.707                                                                         |
| $\mu$ (mm <sup>-1</sup> )                                               | 5.463                                                                         |
| Flack parameter                                                         | [0.005(16)]                                                                   |
| <i>F</i> <sub>000</sub>                                                 | 2240                                                                          |
| GOF                                                                     | 1.073                                                                         |
| <i>R</i> <sub>1</sub> <sup><i>a</i></sup> ( <i>I</i> > 2σ( <i>I</i> ))  | 0.0483                                                                        |
| <i>wR</i> <sub>2</sub> <sup><i>b</i></sup> ( <i>I</i> > 2σ( <i>I</i> )) | 0.1223                                                                        |
| <i>R</i> <sub>1</sub> <sup><i>a</i></sup> (all data)                    | 0.0595                                                                        |
| <i>wR</i> <sub>2</sub> <sup><i>b</i></sup> (all data)                   | 0.1154                                                                        |
| $\Delta\rho_{\max}/\Delta\rho_{\min}$ (e Å <sup>-3</sup> )              | 2.069/-1.351                                                                  |

$${}^a R_1 = \sum ||F_0| - |F_c|| / \sum |F_0|. \quad {}^b wR_2 = \{ \sum [w(F_0^2 - F_c^2)^2] / \sum [w(F_0^2)^2] \}^{1/2}.$$

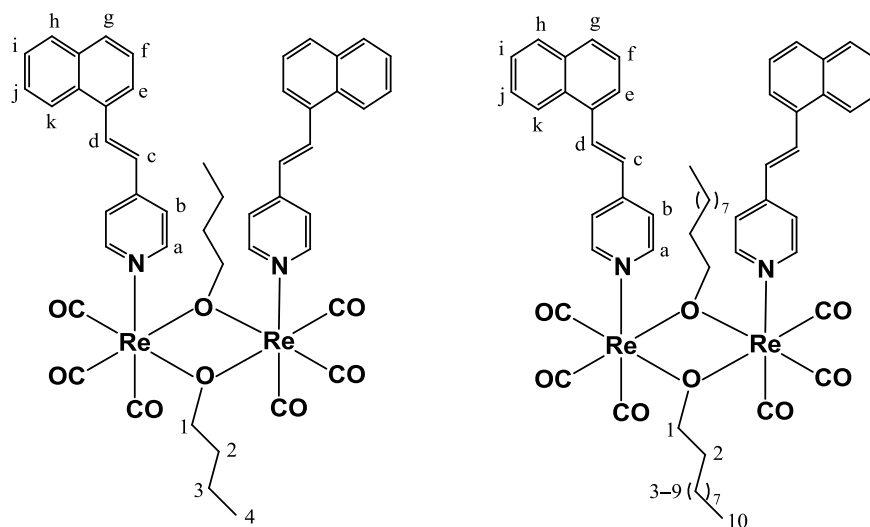

**Scheme S1.**  $^1\text{H}$  NMR numbering for complexes **1** and **2**.

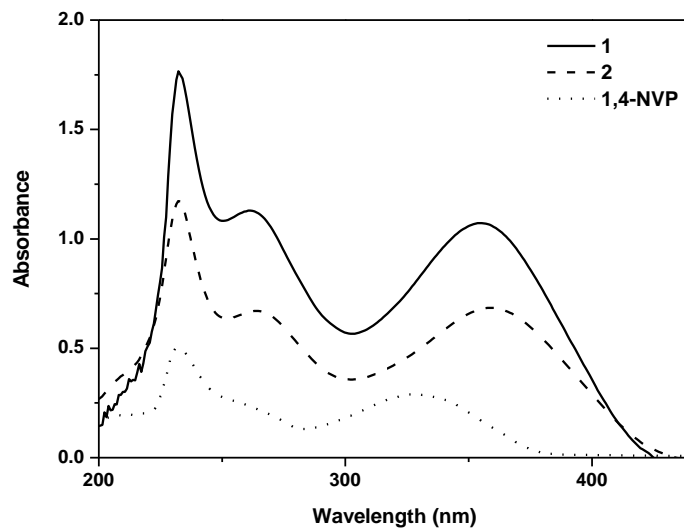

**Figure S1.** UV-vis spectra of complexes **1** (solid line) and **2** (dash line) and free ligand 1,4-NVP (dot line) in  $\text{CH}_2\text{Cl}_2$ .

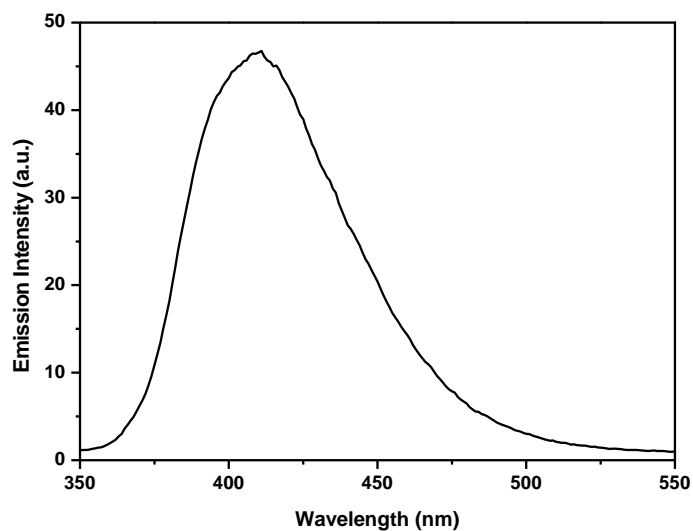

**Figure S2.** Emission spectrum of 4-(1-naphthylvinyl)pyridine ligand in  $\text{CH}_2\text{Cl}_2$ .

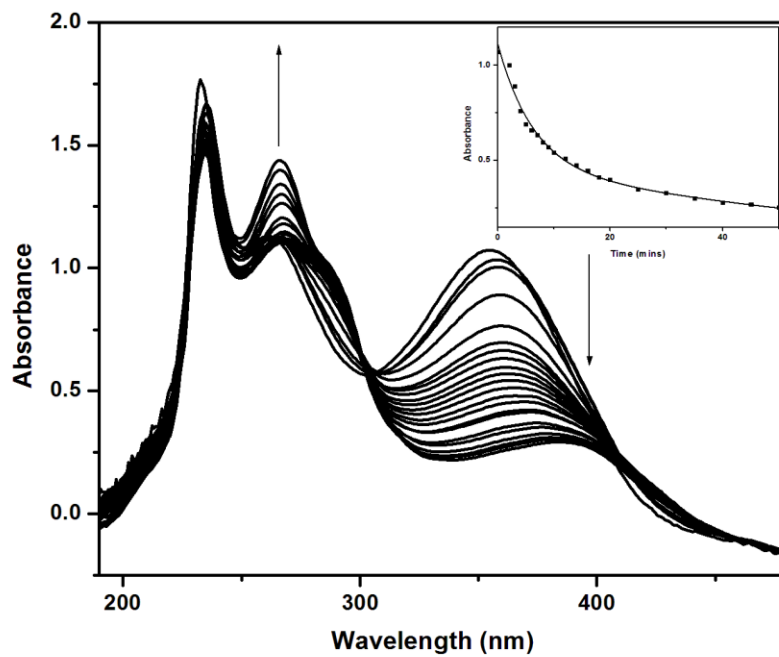

**Figure S3.** UV-vis spectral changes of complex **1** ( $3 \times 10^{-5}$  M) in CH<sub>2</sub>Cl<sub>2</sub> upon irradiation at 365 nm.

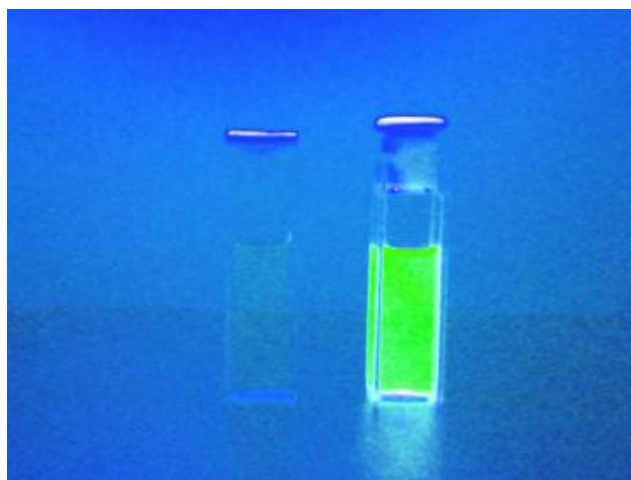

**Figure S4.** Photograph taken before and after the irradiation of **2** under illumination from a UV lamp at 365 nm in CH<sub>2</sub>Cl<sub>2</sub>.

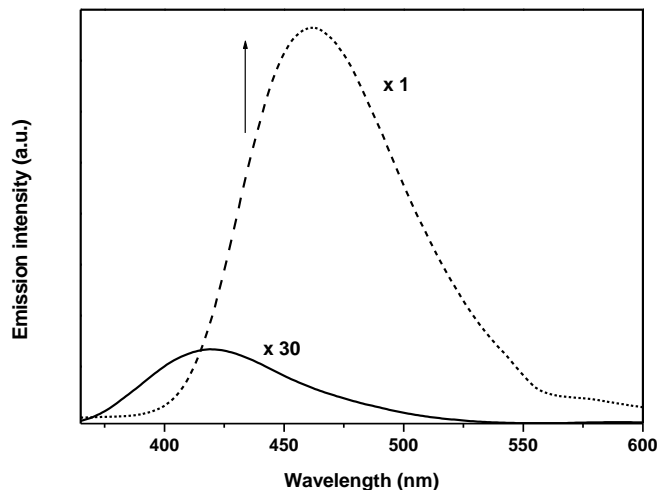

**Figure S5.** Emission spectra of **2** ( $3 \times 10^{-5}$  M) before (—) and after (-----) photolysis in CH<sub>2</sub>Cl<sub>2</sub>.

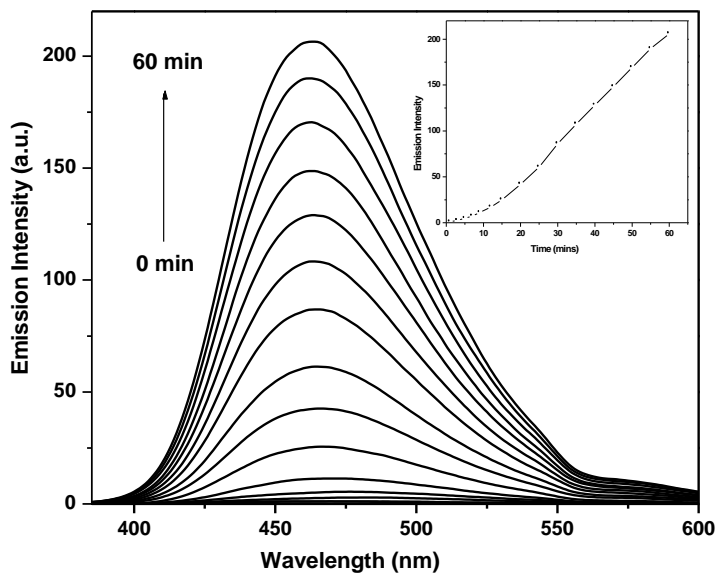

**Figure S6.** Enhancement in emission intensity upon 365 nm irradiation of complex **1** ( $3 \times 10^{-5}$  M) in CH<sub>2</sub>Cl<sub>2</sub>.

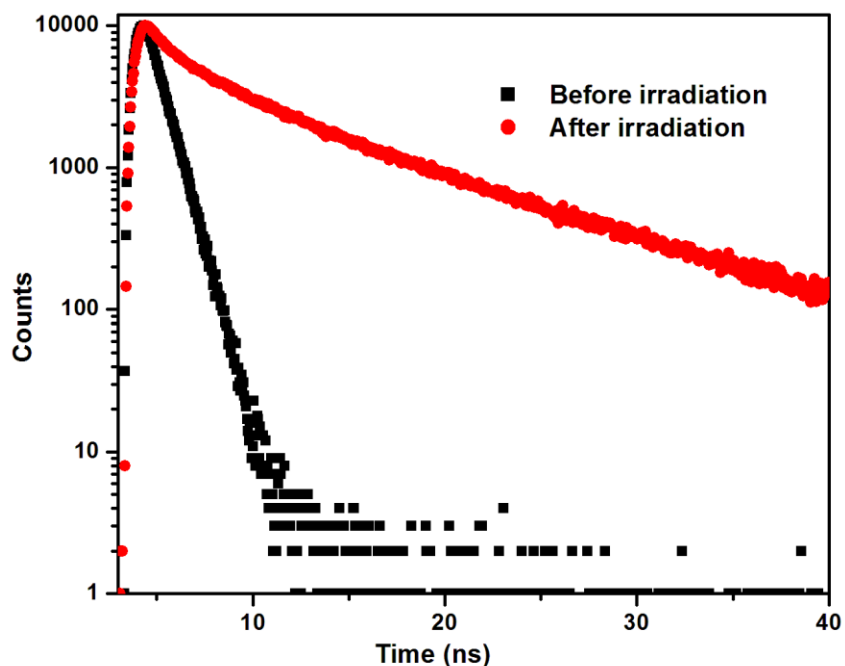

**Figure S7.** Lifetime decay profiles of **2** in CH<sub>2</sub>Cl<sub>2</sub> before (black line) and after (red line) irradiation.

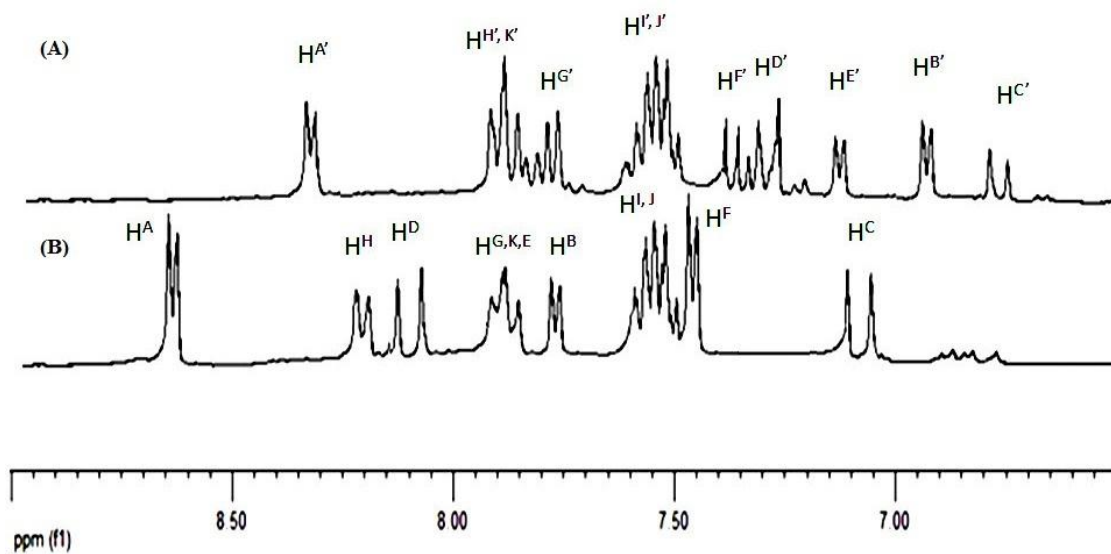

**Figure S8.** <sup>1</sup>H NMR spectra of complex **2** after (A) and before (B) irradiation at 365 nm in CDCl<sub>3</sub>.

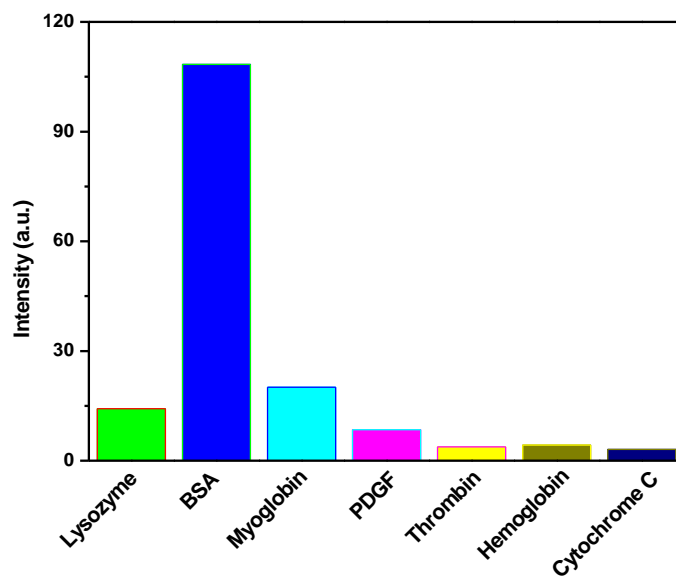

**Figure S9.** Comparison of the fluorescence intensity of **2** (20  $\mu\text{M}$ ) in the presence of various proteins.

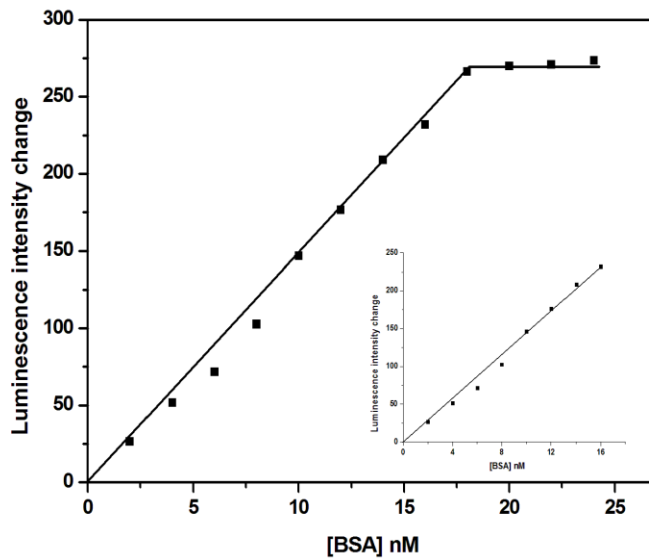

**Figure S10.** Luminescence intensity change of complex **2** versus [BSA] in PBS buffer. The concentration of BSA is 0–24  $\times 10^{-9}$  M. Inset: calibration plot of BSA sensor ( $R = 0.993$ ).

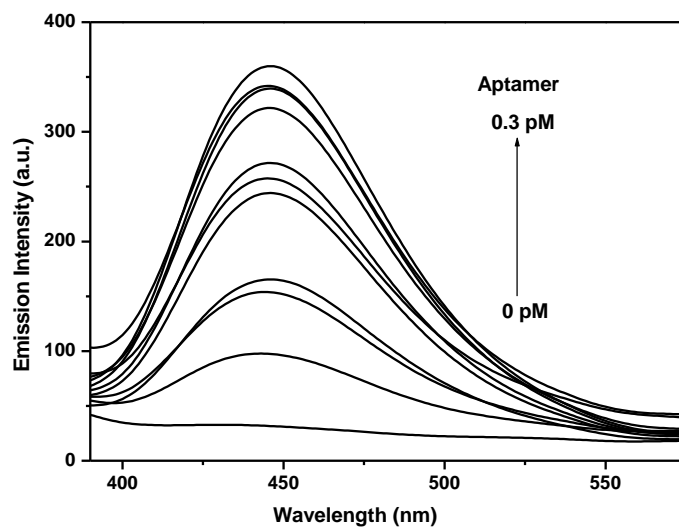

**Figure S11.** Emission spectral changes of complex **1** (10  $\mu\text{M}$ ) with the addition of PDGF aptamer (0 pM to 0.3 pM) in PBS buffer.

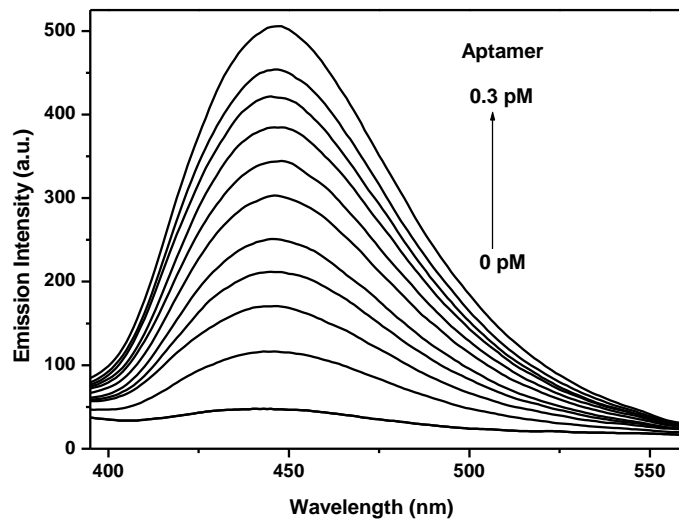

**Figure S12.** Emission spectral changes of **2** (10  $\mu\text{M}$ ) with the addition of PDGF binding aptamer (0 pM to 0.3 pM) in PBS buffer (pH = 7.4).



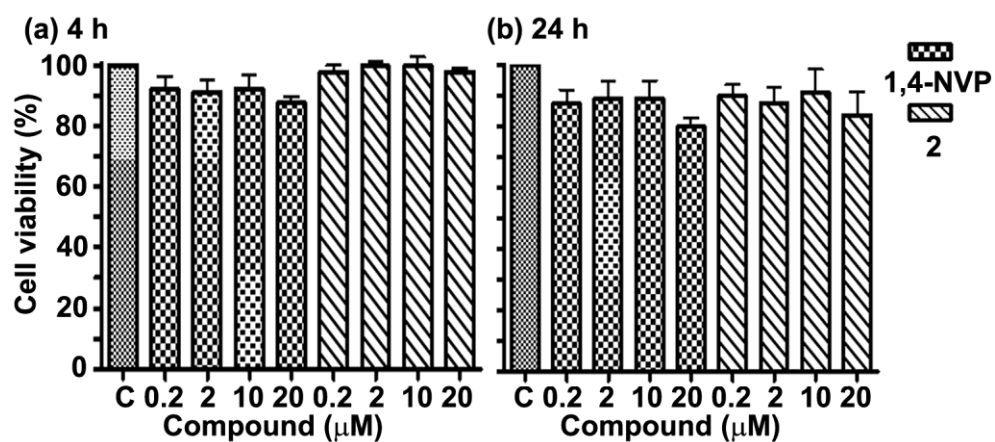

**Figure S13.** *In vitro* cell viability effects of 1,4-NVP and rhenium(I) complex **2** in inhibiting the growth of breast epithelium cells, M10, at 4 and 24 h..
